# Supplementary material for: Keratin 6A promotes skin inflammation through JAK1-STAT3 activation in keratinocytes
Source: Springer Nature journal article supplement (doi:10.1186/s12929-025-01143-9), 2025-05-09
Supplement: MOESM1 [file 12929_2025_1143_MOESM1_ESM.pdf]

1 **SUPPLEMENTARY MATERIALS**

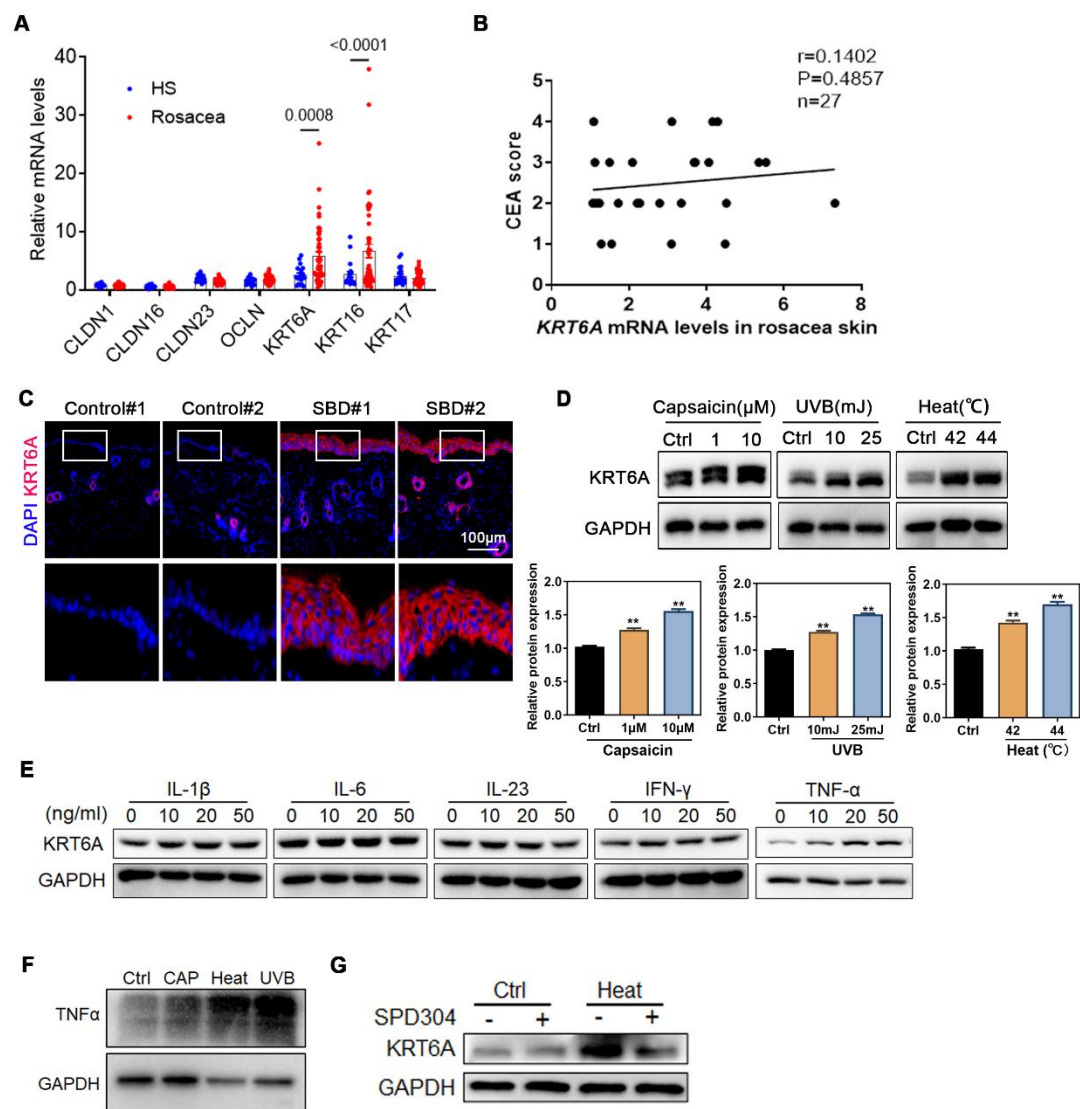

2

3 Figure S1. KRT6A is up-regulated in irritated conditions of rosacea and

4 psoriasis.

5 (A) The mRNA levels of skin barrier alarms in rosacea lesions(n=16) and

6 healthy controls(n=19). (B) Correlation analysis between KRT6A expression

7 and CEA score in rosacea lesions. (C) Representative IF images showing the

8 expression of KRT6A in the skin of mice with skin barrier dysfunction by

9 tape-stripping. SBD: skin barrier dysfunction. (D) Representative western

blot images showing the expression of KRT6A in HaCaT cells treated with  
 capsaicin, UVB, or high temperatures. Quantification of relative protein  
 expression is shown in the bottom panel. (E) Representative western blot  
 images showing the expression of KRT6A in HaCaT cells treated with various  
 concentration of IL-1 $\beta$ , IL-6, IL-23, IFN- $\gamma$  or TNF- $\alpha$ . (F) Representative western  
 blot images showing the expression of TNF $\alpha$  in HaCaT cells treated with  
 capsaicin, UVB, or high temperatures. (G) Representative western blot images  
 showing the expression of KRT6A in HaCaT cells treated with high  
 temperatures and with or without SPD304 (2 $\mu$ M). Two-tailed unpaired  
 Student's t-test (D) was used. All experiments were performed in 3  
 independent biological replicates. Data represents the mean  $\pm$  SD. \* $p$  < 0.05,  
 \*\* $p$  < 0.01. Two-tailed unpaired Student's t-test (D) was used.

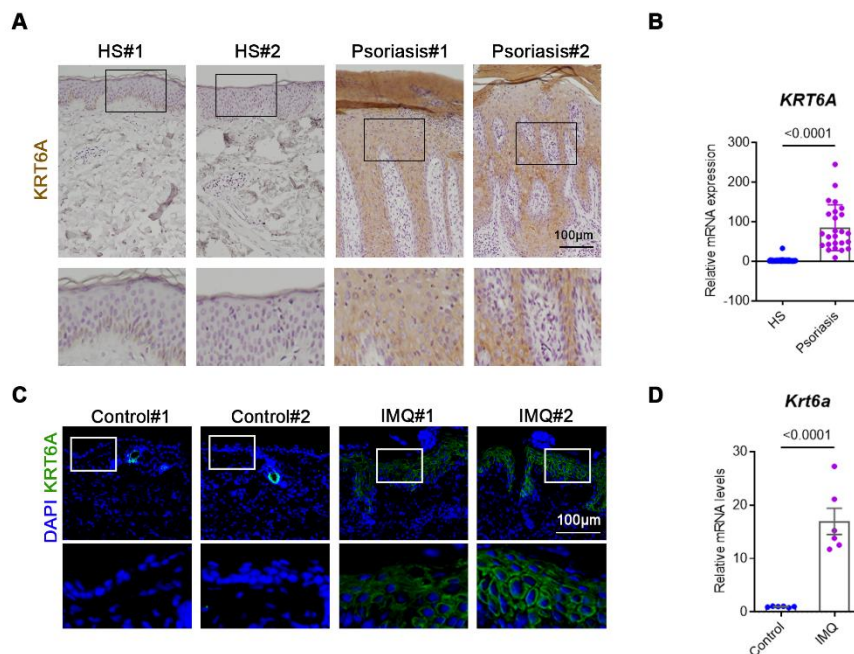

Figure S2. KRT6A is up-regulated in psoriasis.  
 (A) Representative IHC images showing the expression of KRT6A in psoriasis

25 lesions and healthy controls. (B) The mRNA levels of KRT6A in psoriasis  
 26 lesions and healthy controls from the GEO database (GSE121212). IF images  
 27 (C) and RT-qPCR analysis (D) showing the expression of KRT6A in the skin of  
 28 IMQ-induced psoriasis-like mice and controls.

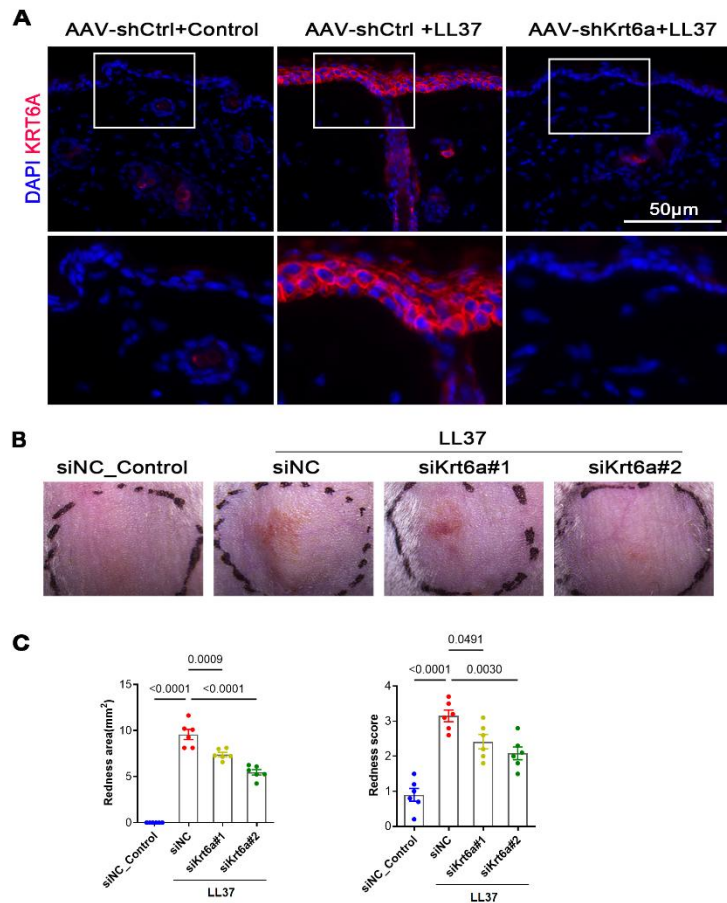

29  
 30 Figure S3. KRT6A knockdown relieves the development of rosacea.  
 31 (A) The knockdown efficiency of KRT6A by AAV in LL37-treated mice. (B) The  
 32 back skins of the control group and siRNA-mediated knockdown of the Krt6a  
 33 group treated with or without LL37 (n=6/group). Images were taken 48 hr after  
 34 the first LL37 injection. (C)The redness score and redness area of the back  
 35 skin of mice in (B). Data represents the mean  $\pm$  SEM. The one-way ANOVA

36 with Bonferroni's post hoc tests was used for multiple comparisons.

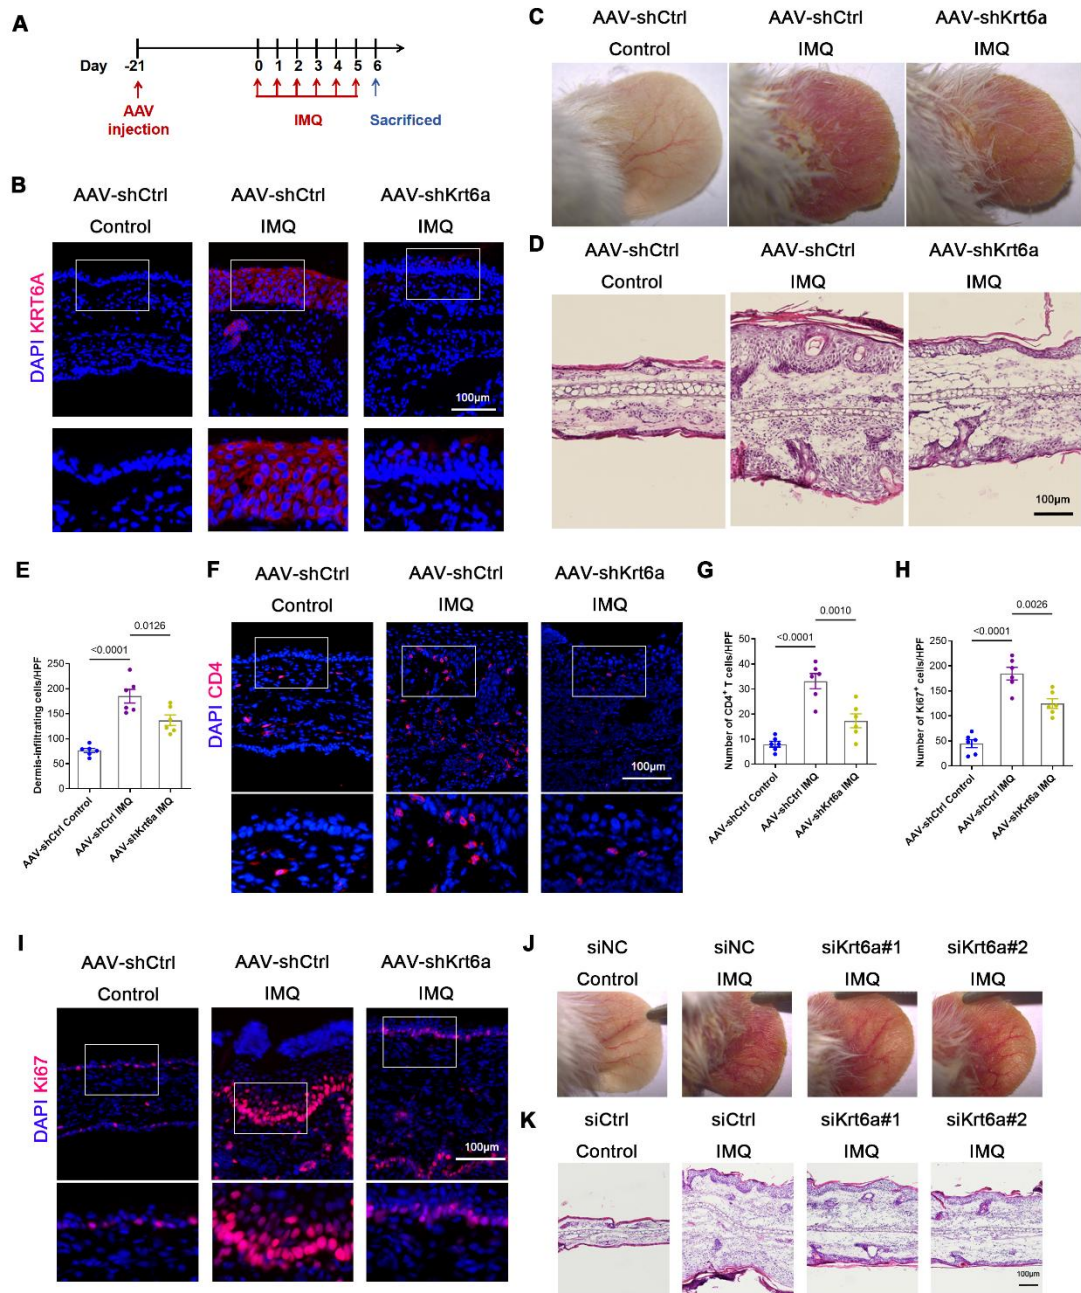

37

38 Figure S4. KRT6A knockdown relieves the development of psoriasis.

39 (A) Schematic diagram of AAV-shKrt6a-injected mice treated with IMQ or  
 40 control. (B) The knockdown efficiency of Krt6a by AAV in IMQ-treated mice. (C)  
 41 Ear skin of mice in control group and Krt6a-knockdown group treated with IMQ  
 42 (n=6/group). (D) HE staining and (E) dermal infiltrating cell counts of the ear in

43 mice. The CD4+ T cell infiltration (F) and cell counts (G) in skin visualized by IF.

44 The Ki67+ cells (H) and cell counts (I) in the skin visualized by IF. (J) The ear

45 skins of the control group and siRNA-mediated knockdown of the Krt6a group

46 treated with or without IMQ (n=6/group). (K) HE staining of the ear in mice.

47 Data represents the mean  $\pm$  SEM. The one-way ANOVA with Bonferroni's post

48 hoc tests was used for multiple comparisons.

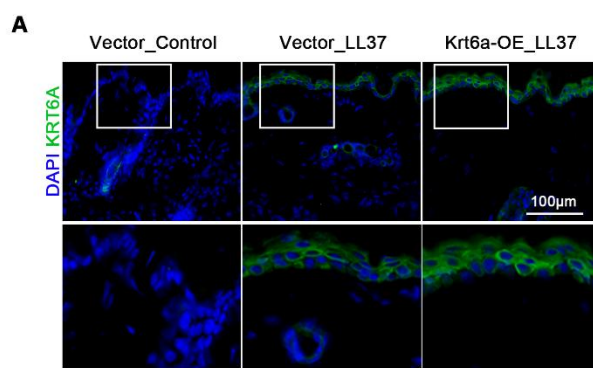

49

50 Figure S5. The efficiency of Krt6a overexpression by lentivirus in LL37-treated

51 mice.



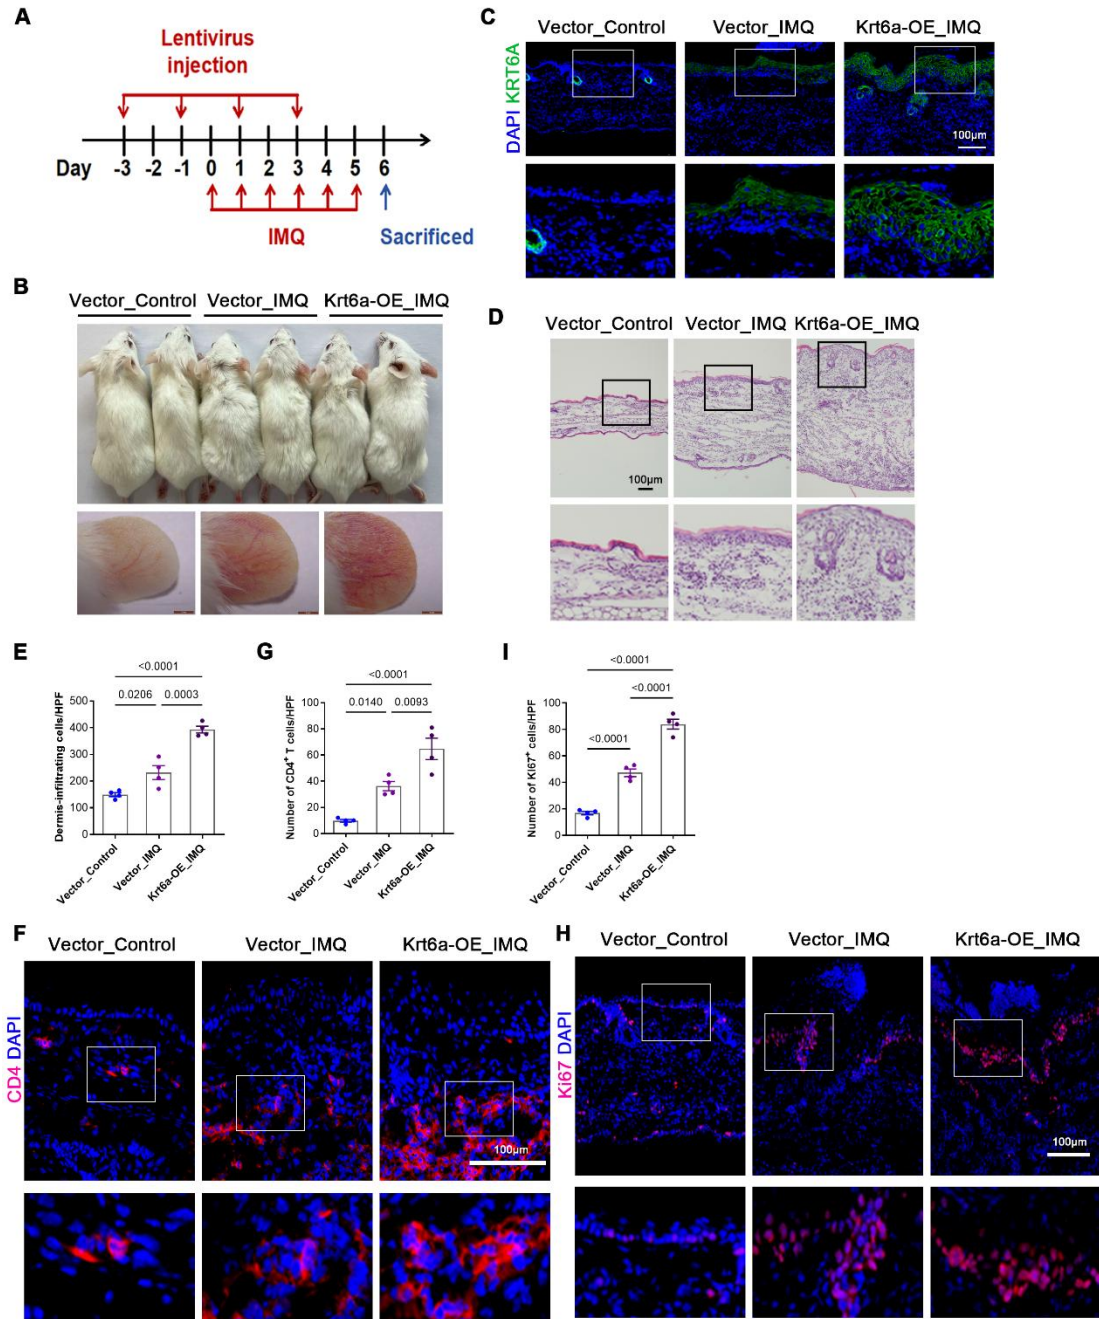

Figure S6. KRT6A promotes the development of psoriasis.

(A) Schematic diagram of lentivirus-injected mice treated with IMQ or control.

(B) Ear skin of mice in the control group and Krt6a-overexpressed group

treated with IMQ. (C) Krt6a overexpressed by lentivirus in IMQ-treated mice.

(D) HE staining and (E) dermal infiltrating cell counts of the ear in mice. (F) The

CD4+ T cell infiltration and (G) cell counts in the skin visualized by IF. (H) The

59 Ki67+ cells, and cell counts (I) in skin visualized by IF. Data represents the  
60 mean  $\pm$  SEM. The one-way ANOVA with Bonferroni's posthoc tests was used  
61 for multiple comparisons.

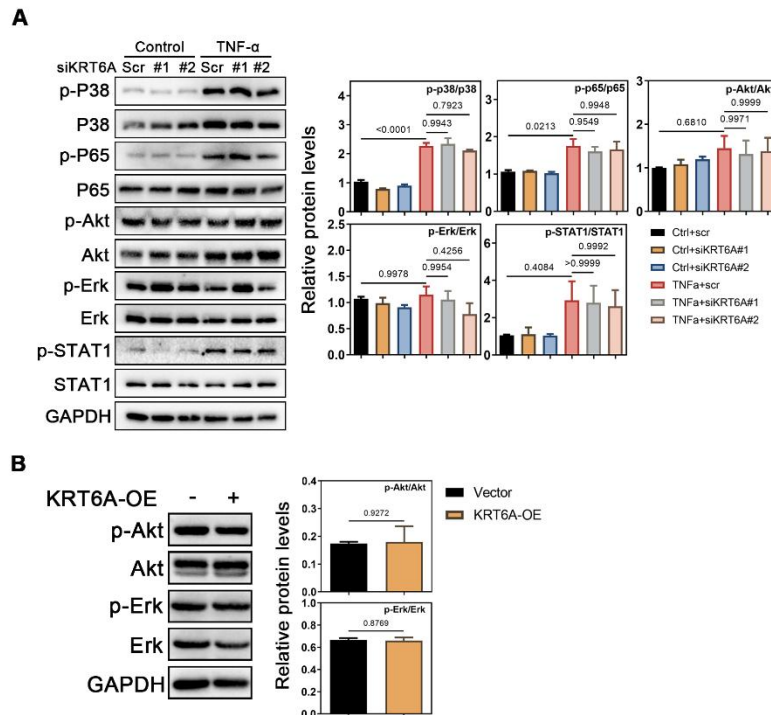

62  
63 Figure S7. KRT6A affects STAT3 activation in keratinocytes.

64 (A) Immunoblotting of p-STAT1, STAT1, p-p65, P65, p-p38, P38, p-AKT, AKT,  
65 p-ERK or ERK in cell lysates from HaCaT cells infected with siKRT6A or Scr  
66 and stimulated with TNF- $\alpha$  for 2 hours. Quantification of relative protein  
67 expression is shown in the right panel. (B) Immunoblotting of p-AKT, AKT,  
68 p-ERK or ERK in cell lysates from KRT6A-overexpressed HaCaT cells.  
69 Quantification of relative protein expression is shown in the right panel.  
70 All experiments were performed in 3 independent biological replicates. Data  
71 represents the mean  $\pm$  SEM. Two-tailed unpaired Student's t-test (B) or 1-way  
72 ANOVA with Bonferroni's post hoc test (A) was used.

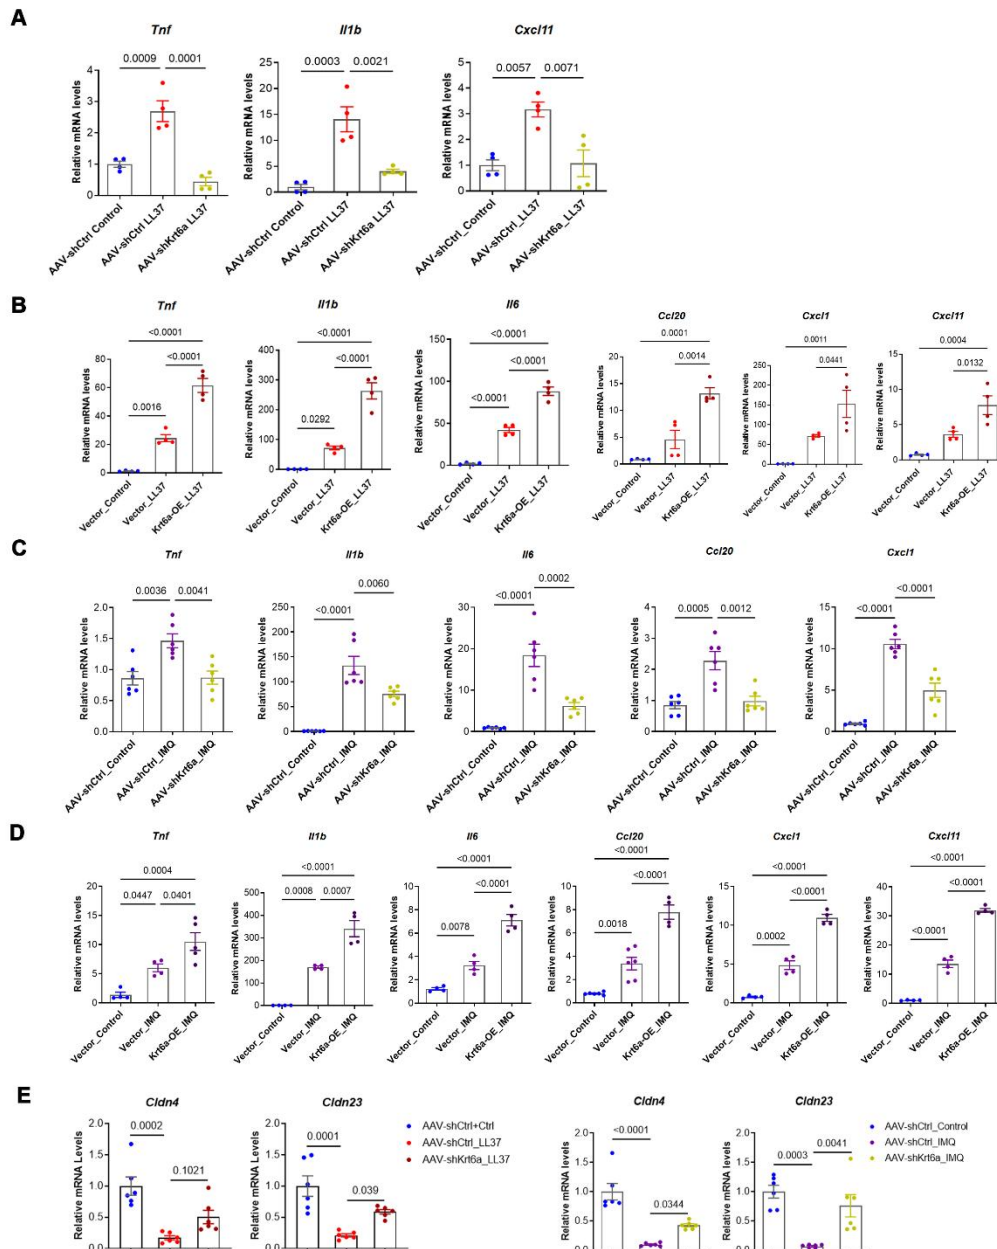

Figure S8. KRT6A affects cytokine expression in vivo.

The mRNA levels of cytokines in LL37-induced mice combined with Krt6a knockdown (A) or overexpression (B). The mRNA levels of cytokines in IMQ-induced mice combined with Krt6a knockdown (C) or overexpression (D). (E) The mRNA levels of *Cldn4* and *Cldn23* in LL37/IMQ-induced mice combined with Krt6a knockdown. Data represents the mean  $\pm$  SEM. The



80 one-way ANOVA with Bonferroni's posthoc tests was used for multiple  
81 comparisons.

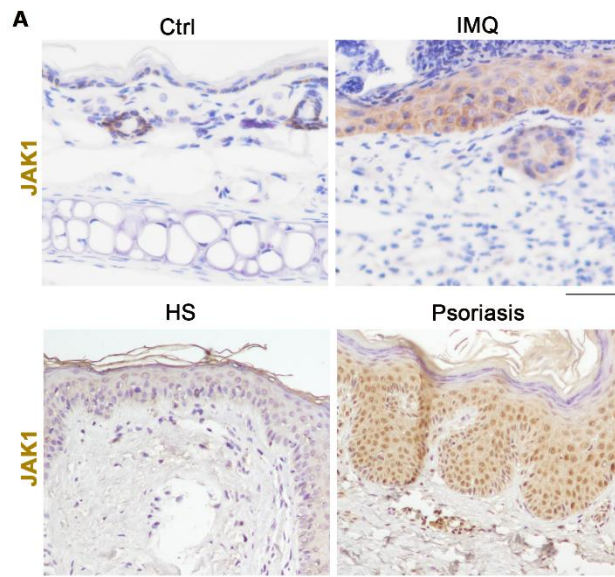

82  
83 Figure S9. JAK1 expression in human and mouse models of psoriasis  
84 Representative IHC images showing the expression of JAK1 in psoriatic  
85 lesions and healthy controls in the upper panel; Representative IHC images  
86 showing the expression of JAK1 in IMQ-induced rosacea-like mice in the  
87 bottom panel.

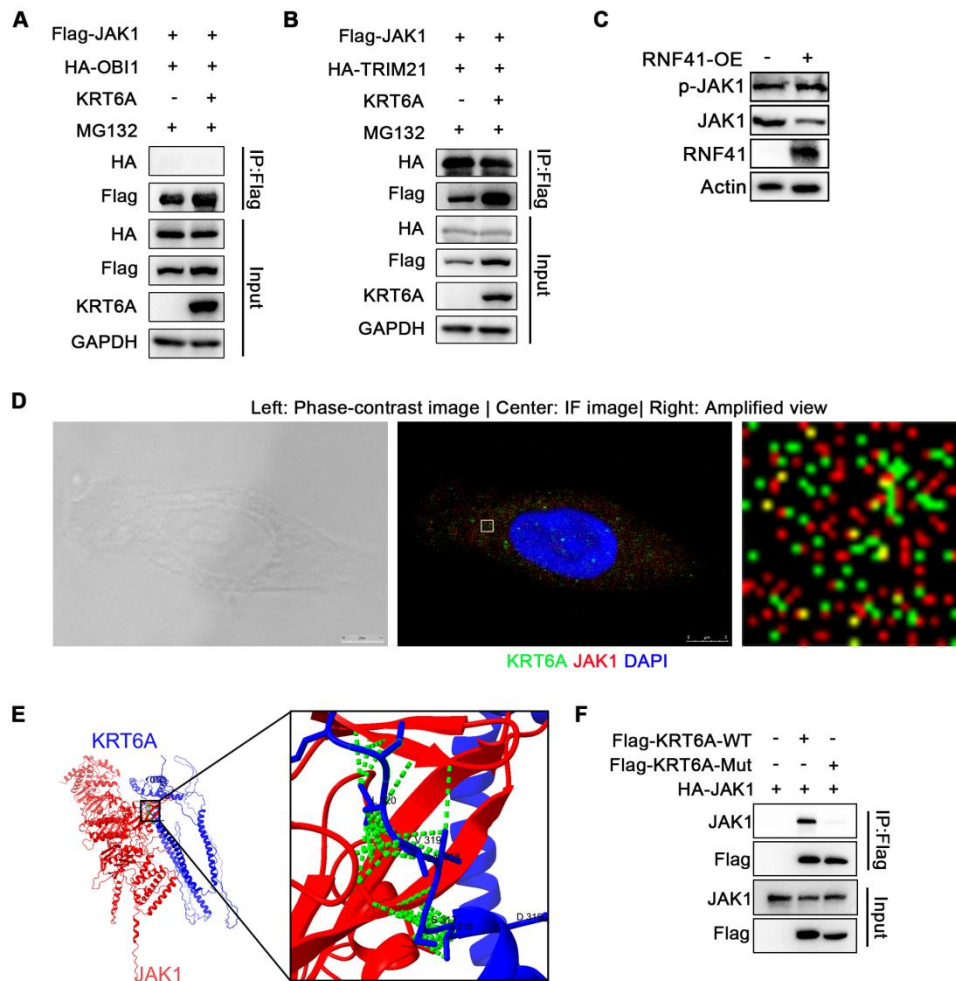

Figure S10. HA-OBI1 plasmid (A) or HA-TRIM21 plasmid (B) combined with Flag-JAK1 plasmid was transfected into HEK293T cells with or without KRT6A plasmid to detect the interaction between JAK1 and the target protein. (C) RNF41 plasmid was transfected into HaCaT cells. (D) Representative images showing the localization of KRT6A and JAK1 in HaCaT cells. Left: Corresponding phase-contrast image confirming intact cell morphology and the spatial localization of the fluorescence signals. Center: Immunofluorescence image illustrating the distribution of KRT6A and JAK1. Right: Magnified view of the region of interest, highlighting the cytoplasmic colocalization signals. Scale bar = 5  $\mu$ m. (E) Diagram of the predicted

99 KRT6A-JAK1 binding region using AlphaFold. (F) HA-JAK1, wildtype  
 100 Flag-KRT6A, or mutant (mut) of KRT6A were coexpressed in HEK293T cells  
 101 for co-IP assay with anti-Flag beads.

102

103 Supplementary Table S1. The List of Primer Sequences for RT-qPCR

| Gene          | Species | Forward sequence        | Reverse sequence         |
|---------------|---------|-------------------------|--------------------------|
| <i>GAPDH</i>  | human   | TGTTGCCATCAATGACCCCTT   | CTCCACGACGTA CT CAGCG    |
| <i>IL1B</i>   | human   | AGCTACGAATCTCCGACCAC    | CGTTATCCCATGTGTCTGAAGAA  |
| <i>IL6</i>    | human   | CCTGAACCTTCCAAAGATGGC   | TTCACCAGGCAAGTCTCCTCA    |
| <i>TNFa</i>   | human   | CCTCTCTCTAATCAGCCCTCTG  | GAGGACCTGGGAGTAGATGAG    |
| <i>CCL20</i>  | human   | TGCTGTACCAAGAGTTTGCTC   | CGCACACAGACA ACTTTTCTTT  |
| <i>CXCL1</i>  | human   | GCCCAAACCGAAGTCATAGCC   | ATCCGCCAGCCTCTATCACA     |
| <i>CXCL11</i> | human   | GACGCTGTCTTTGCATAGGC    | GGATTTAGGCATCGTTGTCCTTT  |
| <i>KRT6A</i>  | human   | ATAAGTGTTGTGAACCCCCACC  | GCAATTGCAAACAGCGAAGAG    |
| <i>Gapdh</i>  | mouse   | AGGTCGGTGTGAACGGATTTG   | TGTAGACCATGTAGTTGAGGTCA  |
| <i>Il1b</i>   | mouse   | GCAACTGTTCTGAACTCAACT   | ATCTTTTGGGGTCCGTCAACT    |
| <i>Il6</i>    | mouse   | TAGTCCTTCTACCCCAATTTCC  | TTGGTCCTTAGCCACTCCTTC    |
| <i>Tnfa</i>   | mouse   | CTGAACTTCGGGGTGATCGG    | GGCTTGTCACCTCGAATTTTGAGA |
| <i>Ccl20</i>  | mouse   | GCCTCTCGTACATACAGACGC   | CCAGTTCTGCTTTGGATCAGC    |
| <i>Cxcl1</i>  | mouse   | CTGGGATTCACCTCAAGAACATC | CAGGGTCAAGGCAAGCCTC      |
| <i>Cxcl11</i> | mouse   | GGCTTCCTTATGTTCAAACAGGG | GCCGTTACTCGGGTAAATTACA   |
| <i>Cldn4</i>  | mouse   | GTCCTGGGAATCTCCTTGGC    | TCTGTGCCGTGACGATGTTG     |

|               |       |                      |                     |
|---------------|-------|----------------------|---------------------|
| <i>Cldn23</i> | mouse | CCCGACGAGTGGAACACTTC | GGCCAGCGACGAAAAACAC |
|---------------|-------|----------------------|---------------------|

104 Supplementary Table S2. The List of Antibody Information

| Antibodies        | Source                                    | Identifier                | Dilution                 |
|-------------------|-------------------------------------------|---------------------------|--------------------------|
| Anti-human KRT6A  | Sigma-Aldrich                             | <a href="#">HPA061168</a> | WB: 1:1000<br>IHC: 1:500 |
| Anti-human JAK1   | Proteintech                               | 66466-1-Ig                | WB: 1:2000               |
| Anti-human pSTAT3 | <a href="#">Cell Signaling Technology</a> | 9145S                     | WB: 1:2000<br>IF: 1:50   |
| Anti-human STAT3  | Proteintech                               | 10253-2-AP                | WB: 1:2000               |
| Anti-human RNF41  | Proteintech                               | 17233-1-AP                | WB: 1:500                |
| Anti-FLAG         | Thermo Fisher Scientific                  | MA1-91878                 | WB: 1:1000               |
| Anti-HA           | <a href="#">Cell Signaling Technology</a> | 3724S                     | WB: 1:1000               |
| Anti-HSP90        | Proteintech                               | 60318-1-Ig                | WB: 1:5000               |
| Anti-LAMIN B1     | Proteintech                               | 66095-1-Ig                | WB: 1:1000               |
| Anti-GAPDH        | <a href="#">Bioworld</a> Technology       | AP0066                    | WB: 1:500                |
| Anti-TUBULIN      | <a href="#">Bioworld</a> Technology       | <a href="#">BS1482M</a>   | WB: 1:1000               |
| Anti-mouse CD4    | Thermo Fisher Scientific                  | 14-0042-85                | IF: 1:100                |
| Anti-mouse CD31   | <a href="#">BD Biosciences</a>            | 558736                    | IF: 1:100                |
| Anti-mouse CD31   | <a href="#">Cell Signaling Technology</a> | 77699                     | IHC: 1:100               |



|                                                                 |                          |                  |             |
|-----------------------------------------------------------------|--------------------------|------------------|-------------|
| Anti-mouse KRT6A                                                | Abcam                    | Company-designed | IHC: 1:500  |
| Anti-mouse Ki67                                                 | Thermo Fisher Scientific | 14-5698-80       | IF: 1:500   |
| Donkey anti-Rabbit,<br>Alexa Fluor™594                          | Thermo Fisher Scientific | A-21207          | IF: 1:500   |
| Donkey anti-Rabbit,<br>Alexa Fluor™488                          | Thermo Fisher Scientific | A-21206          | IF: 1:500   |
| Donkey anti-Rat, Alexa<br>Fluor™594                             | Thermo Fisher Scientific | A-21209          | IF: 1:500   |
| <a href="#">Goat Anti-Rabbit IgG</a><br><a href="#">H&amp;L</a> | ZSGB-BIO                 | ZB-2301          | WB: 1:20000 |
| <a href="#">Goat Anti-Mouse IgG</a><br><a href="#">H&amp;L</a>  | ZSGB-BIO                 | ZB-2305          | WB: 1:20000 |

105
